# Supplementary material
Source: publisher figshare collection journal article supplement (https://acs.figshare.com/ndownloader/files/4472416)
Supplement: Supplementary file 1 [file 4472416]

Supporting Information

for

**Formation and Structure of an (Iminium Ion)ruthenium Complex,  
and Reaction of the (Iminium Ion)-moiety Toward Alcohols**

*Sohei Fukui,<sup>†</sup> Noriyuki Suzuki,<sup>†</sup> Tohru Wada,<sup>‡</sup> Koji Tanaka,<sup>‡</sup> and Hirotaka Nagao<sup>\*†</sup>*

<sup>†</sup> Department of Materials and Life Sciences, Faculty of Science and Technology, Sophia University,

7-1 Kioicho, Chiyoda-ku, Tokyo 102-8554, Japan,

and

<sup>‡</sup> Institute for Molecular Science and CREST, Japan Science and Technology Corporation (JST), 38

Nishigonaka, Myodaiji, Okazaki, Aichi 444-8585, Japan

E-mail: h-nagao@sophia.ac.jp

## I. Synthesis of ethylbis(2-pyridylethyl)amine (ebpea)

A solution of  $\text{CH}_3\text{SO}_2\text{Cl}$  (18.3 g, 0.16 mol) in diethyl ether (80  $\text{cm}^3$ ) was slowly added to a solution of 2-(2-hydroxyethyl)pyridine (19.7 g, 0.16 mol) and  $\text{N}(\text{Et})_3$  (24.0 g) in  $\text{CH}_2\text{Cl}_2$  (80  $\text{cm}^3$ ) on an ice bath. A light brown solution of 2-(2-methenesulfonateethyl)pyridine was formed. The 2-(2-methenesulfonateethyl)pyridine was extracted with a mixed solution of  $\text{CH}_2\text{Cl}_2$  (640  $\text{cm}^3$ ) and an aqueous  $\text{NaHCO}_3$  solution (9.720 g  $\text{NaHCO}_3$  in 200  $\text{cm}^3$   $\text{H}_2\text{O}$ ). The extracted solution was evaporated with a rotary evaporator to give a chestnut-colored solution. A solution of  $\text{NH}_2\text{C}_2\text{H}_5$  (70%, 6.4  $\text{cm}^3$ , 0.08 mol),  $\text{N}(\text{Et})_3$  (12.0 g), and  $\text{CH}_2\text{Cl}_2$  (40  $\text{cm}^3$ ) were added to the solution. This mixture was then refluxed at 50°C for 9 hrs. This solution was extracted with a mixed solution of  $\text{CH}_2\text{Cl}_2$  (480  $\text{cm}^3$ ) and the aqueous  $\text{NaHCO}_3$  solution (9.720 g  $\text{NaHCO}_3$  in 200  $\text{cm}^3$   $\text{H}_2\text{O}$ ). The extracted solution was evaporated with a rotary evaporator to give a chestnut-colored solution. This solution was purified by alumina and silica column chromatography. Yield: 7.574 g (37%).  $^1\text{H}$  NMR ( $(\text{CD}_3)_2\text{SO}$ , 500MHz):  $\delta$  0.87 (3H, t,  $J = 7$ ,  $\text{CH}_3(\text{ethyl})$ ), 2.50 (2H, q,  $J = 7$  Hz,  $\text{CH}_2(\text{ethyl})$ ), 2.77 (8H, m,  $\text{CH}_2$ ), 7.11 (2H, ddd,  $J = 1, 5, 8$  Hz, 5-H(py)), 7.15 (2H, dd,  $J = 1, 8$  Hz, 3-H(py)), 7.58 (2H, td,  $J = 2, 8$  Hz, 4-H(py)), 8.42 (2H, ddd,  $J = 1, 2, 5$  Hz, 6-H(py)).  $^{13}\text{C}$  NMR ( $\text{CDCl}_3$ , 500MHz):  $\delta$  11.72, 35.56, 47.09, 53.10, 120.71, 122.99, 135.87, 148.79, 160.34. MS ( $\text{EI}^+$ ):  $m/z$  255 ( $\text{ebpea}^+$ ). The purity of the product was confirmed by GC-MS.

## II. Syntheses of ruthenium complexes

***mer*(Cl, Cl, Cl)-[ $\text{RuCl}_3(\eta^2\text{-NCHCH}_2\text{py}(\text{C}_2\text{H}_4\text{py})\text{C}_2\text{H}_5)$ ] (*mer*-[1]):** A dark brown solution (3:2 v/v) of  $\text{RuCl}_3 \cdot n\text{H}_2\text{O}$  (Ru content 42.60 wt%, 400 mg, 1.68 mmol) in  $\text{EtOH-H}_2\text{O}$  40  $\text{cm}^3$  was refluxed until a color changed to dark blue (Ru-blue). Then 432 mg (1.69 mmol) of ebpea was added to the magnetically stirred dark blue solution to give a dark green solution. After this solution was refluxed for 15 minutes, 8  $\text{cm}^3$  of hydrochloric acid was added to give a dark brown solution. The solution was refluxed for 30 minutes and then cooled at room temperature to give a dark brown precipitate that was collected by filtration and washed with  $\text{H}_2\text{O}$ ,  $\text{EtOH}$ , and diethyl ether. Yield: 255 mg (42%). Anal. calcd for  $\text{C}_{16}\text{H}_{22}\text{N}_3\text{OCl}_3\text{Ru}$ : C, 40.05; H, 4.62; N, 8.76%. Found; C, 40.02; H, 4.20; N, 8.96%.  $^1\text{H}$  NMR( $(\text{CD}_3)_2\text{SO}$ , 500 MHz):  $\delta$  1.06 (3H, t,  $J = 7$  Hz,  $\text{CH}_3(\text{ethyl})$ ), 2.75 (1H, m,  $\text{CH}_2$ ), 2.93 (1H, q,  $J = 5, 17$  Hz,  $\text{CH}_2$ ), 3.60 (2H, overlapped with  $(\text{CD}_3)_2\text{SO}$ ,  $\text{CH}_2(\text{ethyl})$ ), 4.18 (2H, m,  $\text{CH}_2$ ), 4.30 (1H, d,  $J = 19$  Hz,  $\text{CH}_2$ ), 4.78 (1H, q,  $J = 5, 19$  Hz,  $\text{CH}_2$ ), 6.56 (1H, d,  $J = 5$  Hz, CH), 7.20-7.31 (4H, m, 3-H(py), 5-H(py)), 7.71 (2H, m, 4-H(py)), 8.90, 9.42 (2H, d, exchangeable, 6-H(py)).

***fac*-[ $\text{Ru}^{\text{III}}\text{Cl}_3(\text{ebpea})$ ] (*fac*-[2]):** A dark brown solution (3:2 v/v) of  $\text{RuCl}_3 \cdot n\text{H}_2\text{O}$  (Ru content 42.60 wt%, 400 mg, 1.68 mmol) in  $\text{EtOH-H}_2\text{O}$  40  $\text{cm}^3$  was refluxed until a color changed to dark blue (Ru-blue). Then 432 mg (1.69 mmol) of ebpea was added to the magnetically stirred dark blue solution to give a dark green solution. After this solution was refluxed for 15 minutes, 4  $\text{cm}^3$  of hydrochloric acid was added to give a dark brown solution. The brown solution was refluxed for 30

min and then cooled to room temperature to give a dark brown precipitate, *mer*(Cl, Cl, Cl)-[RuCl<sub>3</sub>(η<sup>2</sup>-NCHCH<sub>2</sub>py(C<sub>2</sub>H<sub>4</sub>py)C<sub>2</sub>H<sub>5</sub>)]. The resulted solid was removed by filtration. Then filtrate was allowed to stand at room temperature for two nights to give a brown precipitate that was collected by filtration and washed with H<sub>2</sub>O, EtOH, and diethyl ether. Yield: 547 mg (73%). Anal. calcd for C<sub>16</sub>H<sub>21</sub>N<sub>3</sub>Cl<sub>3</sub>Ru: C, 41.52; H, 4.57; N, 9.08%. Found; C, 41.18; H, 4.53; N, 9.06%. FAB MS: 487 (M+Na).

***mer*-[Ru<sup>III</sup>Cl<sub>3</sub>(ebpea)] (*mer*-[2]):** A suspended solution of *mer*-[1] (20 mg, 0.043 mmol) in MeOH (20 cm<sup>3</sup>) was magnetically stirred for 6 hrs to give a yellow solution. The volume of the yellow solution was reduced to dryness with a rotary evaporator. EtOH was added to the formed light brown solid. The complex was collected by filtration and washed with H<sub>2</sub>O, EtOH, and diethyl ether. Yield: 15 mg (75%). Anal. calcd for C<sub>16</sub>H<sub>21</sub>N<sub>3</sub>Cl<sub>3</sub>Ru: C, 41.52; H, 4.57; N, 9.08%. Found; C, 41.02; H, 4.39; N, 8.92%. FAB MS: 487 (M+Na).

### III. NMR spectra

<sup>1</sup>H and <sup>13</sup>C NMR spectra were obtained with a JEOL JML-LA500 spectrometer and a JEOL AL300 spectrometer.

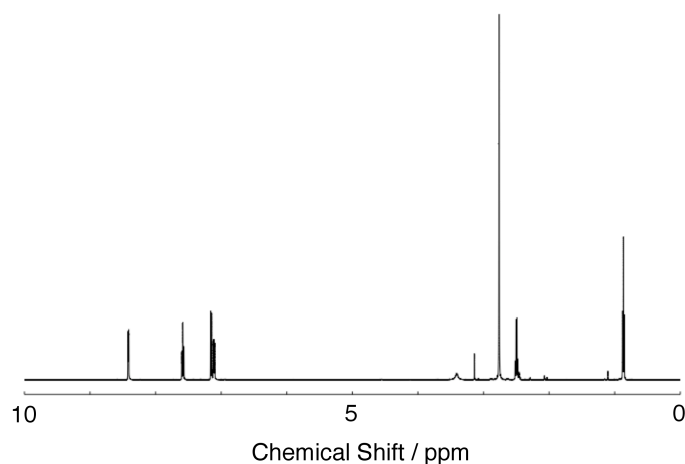

Figure S1. <sup>1</sup>H NMR spectrum of ethylbis(2-pyridylethyl)amine in CDCl<sub>3</sub>.

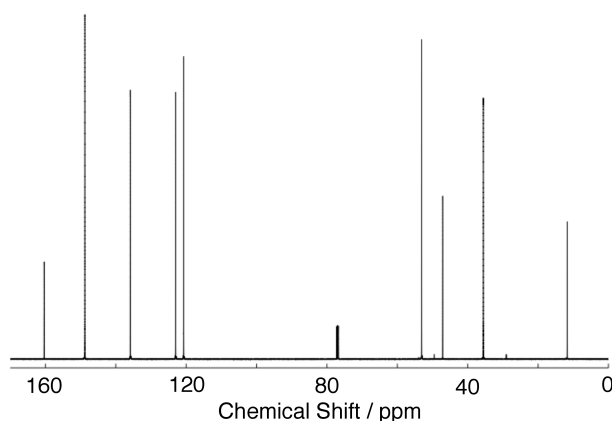

Figure S2. <sup>13</sup>C NMR spectrum of ethylbis(2-pyridylethyl)amine in CDCl<sub>3</sub>.

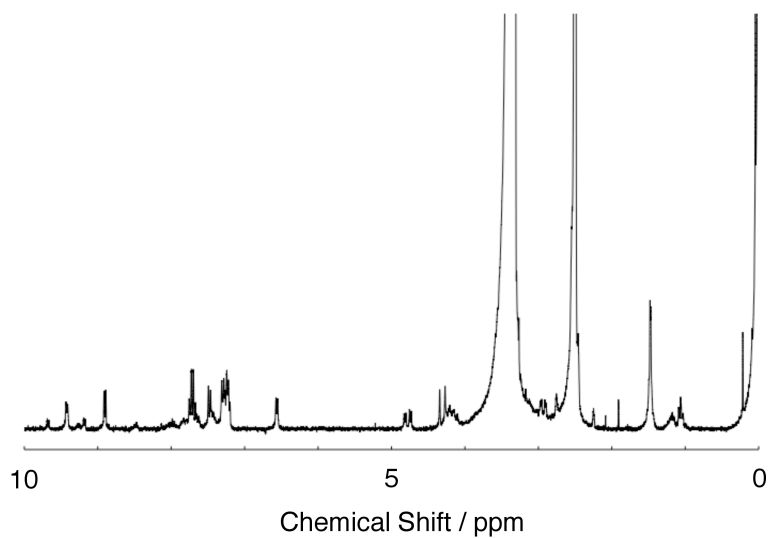

Figure S3.  $^1\text{H}$  NMR spectrum of  $\text{mer}(\text{Cl}, \text{Cl}, \text{Cl})\text{-}[\text{RuCl}_3(\eta^2\text{-NCHCH}_2\text{py}(\text{C}_2\text{H}_4\text{py})\text{C}_2\text{H}_5)]$  in  $(\text{CD}_3)_2\text{SO}$ .

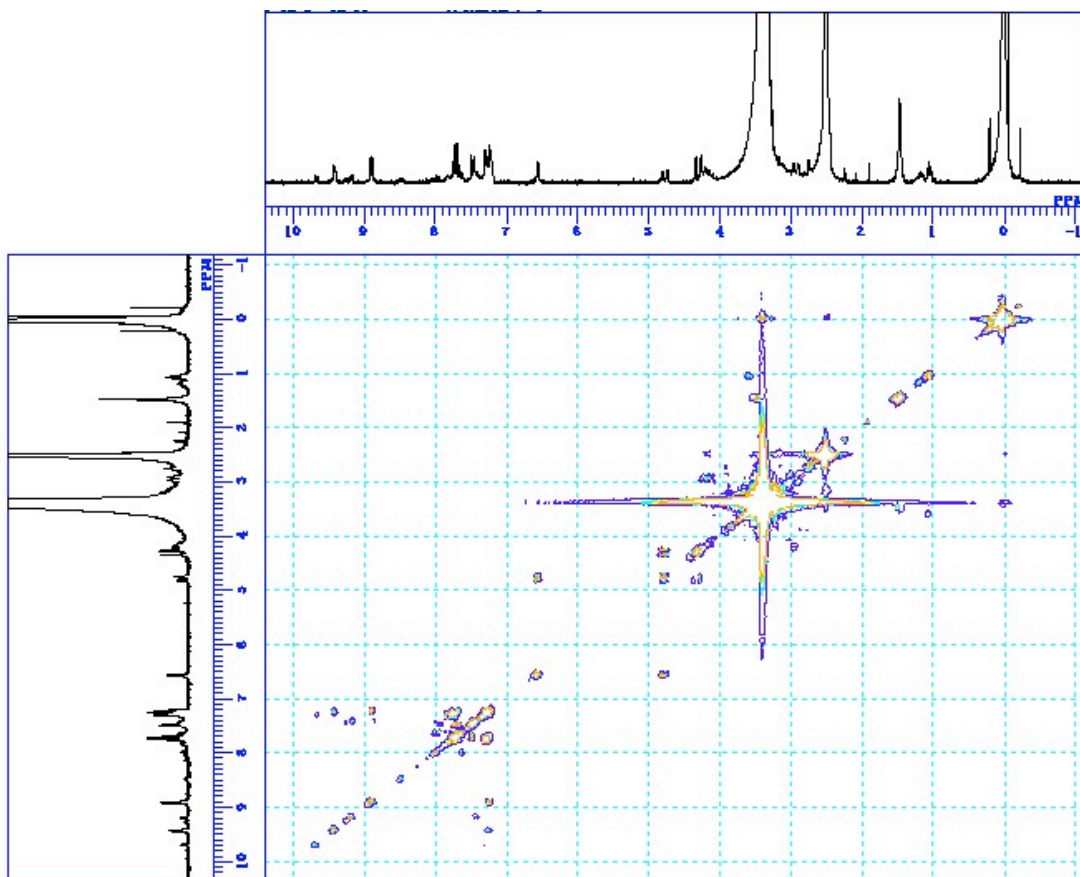

Figure S4. 2D NMR spectrum of  $\text{mer}(\text{Cl}, \text{Cl}, \text{Cl})\text{-}[\text{RuCl}_3(\eta^2\text{-NCHCH}_2\text{py}(\text{C}_2\text{H}_4\text{py})\text{C}_2\text{H}_5)]$  in  $(\text{CD}_3)_2\text{SO}$ .

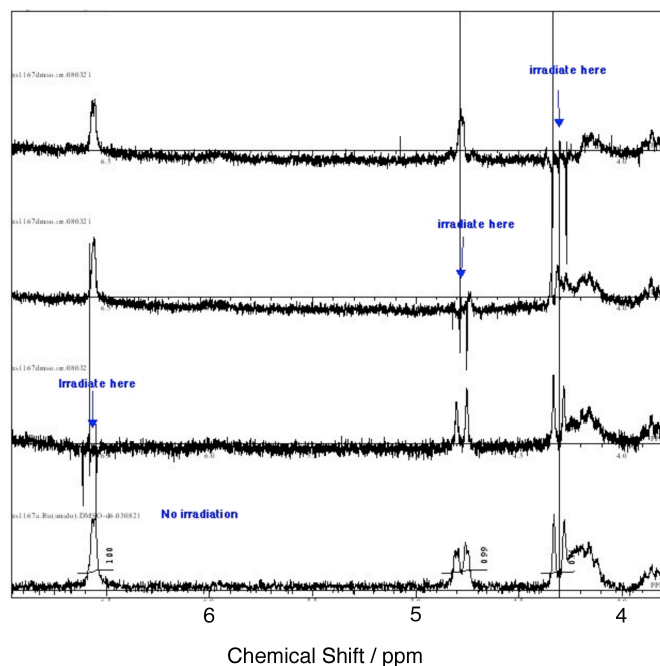

Figure S5. Homo-decoupling spectra of *mer*(Cl, Cl, Cl)-[RuCl<sub>3</sub>(η<sup>2</sup>-NCHCH<sub>2</sub>py(C<sub>2</sub>H<sub>4</sub>py)C<sub>2</sub>H<sub>5</sub>)] in (CD<sub>3</sub>)<sub>2</sub>SO.

#### IV. Cyclic voltammetry

Cyclic voltammetry was made on a CH<sub>2</sub>Cl<sub>2</sub> solutions containing in 0.1 mol dm<sup>-3</sup> tetrabutylammonium hexafluorophosphate (TBAH, Wako.) as supporting electrolyte with a platinum disk working electrode ( $\phi = 1.6$  mm), and an Ag|0.01 mol dm<sup>-3</sup> AgNO<sub>3</sub> reference electrode by using a BAS 100B/W Electrochemical Analyzer. At the end of each measurement, ferrocene (0.07 V) was added as an internal standard to correct redox potentials.

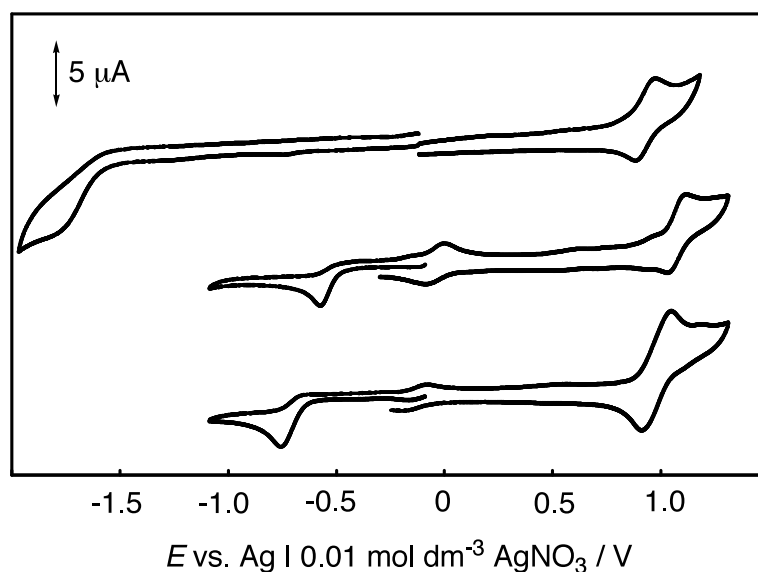

Figure S6. Cyclic voltammograms of (a) *mer*(Cl, Cl, Cl)-[RuCl<sub>3</sub>(η<sup>2</sup>-NCHCH<sub>2</sub>py(C<sub>2</sub>H<sub>4</sub>py)C<sub>2</sub>H<sub>5</sub>)] in CH<sub>2</sub>Cl<sub>2</sub> with scan rate 100 mV/s at -40°C, (b) *fac*-[Ru<sup>III</sup>Cl<sub>3</sub>(ebpea)] in CH<sub>2</sub>Cl<sub>2</sub> with scan rate 100 mV/s at -40°C, (c) *mer*-[Ru<sup>III</sup>Cl<sub>3</sub>(ebpea)] in CH<sub>2</sub>Cl<sub>2</sub> with scan rate 100 mV/s at -40°C.

## V. X-Ray crystallography

Table S1. Selected bond distances /Å and angles /° for *mer*-[1] and *fac*-[2].

|            | <i>mer</i> -[1] | <i>fac</i> -[2] |
|------------|-----------------|-----------------|
| Ru-N1      | 2.154(3)        | 2.2013(18)      |
| Ru-N2      | 2.083(3)        | 2.0961(17)      |
| Ru-N3      | 2.113(3)        | 2.1255(16)      |
| Ru-Cl1     | 2.3853(10)      | 2.3703(6)       |
| Ru-Cl2     | 2.3822(10)      | 2.3507(4)       |
| Ru-Cl3     | 2.4333(10)      | 2.3852(4)       |
| Ru-C3      | 2.101(4)        | -               |
| N1-C1      | 1.506(4)        | 1.510(2)        |
| N1-C3      | 1.378(5)        | 1.516(2)        |
| N1-C5      | 1.492(4)        | 1.496(2)        |
| C1-C2      | 1.516(6)        | 1.528(3)        |
| C3-C4      | 1.508(5)        | 1.519(3)        |
| C5-C6      | 1.522(6)        | 1.527(3)        |
| Cl1-Ru-Cl2 | 84.66(3)        | 88.61(2)        |
| Cl1-Ru-Cl3 | 80.75(3)        | 84.772(18)      |
| Cl2-Ru-Cl3 | 165.40(3)       | 90.012(16)      |
| N1-Ru-N2   | 90.99(12)       | 88.21(7)        |
| N1-Ru-N3   | 90.90(11)       | 93.46(6)        |
| N2-Ru-N3   | 176.89(15)      | 93.37(6)        |
| N1-Ru-Cl1  | 169.98(10)      | 174.56(4)       |
| N1-Ru-Cl2  | 85.32(10)       | 95.60(4)        |
| N1-Ru-Cl3  | 109.27(10)      | 91.77(4)        |
| C3-Ru-N1   | 37.77(14)       | -               |
| C3-Ru-N2   | 79.52(14)       | -               |
| C3-Ru-N3   | 103.45(14)      | -               |
| N1-C1-C2   | 112.9(3)        | 117.90(17)      |
| N1-C3-C4   | 123.7(3)        | 117.16(17)      |
| N1-C5-C6   | 113.0(3)        | 113.46(17)      |
